# Supplementary material
Source: PubMed Central journal article supplement (PMC7922746)

As a supplementary analysis, we calculated the cerebral metabolic rate of oxygen consumption (CMRO<sub>2</sub>), which can be estimated in units of ml O<sub>2</sub>/100g tissue/min by combining the above measurements according to:

$$CMRO_2 = \text{Oxygen delivered} * OEF.$$

**Figure 1: CMRO<sub>2</sub> in adults with SCA.** In adults with SCA overall, there was a significant association between VHS and CMRO<sub>2</sub> (Jonckheere-Terpstra p=0.050). In adults with SCA and overt stroke, there was no association between VHS and CMRO<sub>2</sub> (Jonckheere-Terpstra p=0.544). This association was also not significant in the subgroups without overt stroke but with SCI/WMH (p=0.139) or without any lesions (p=0.098).

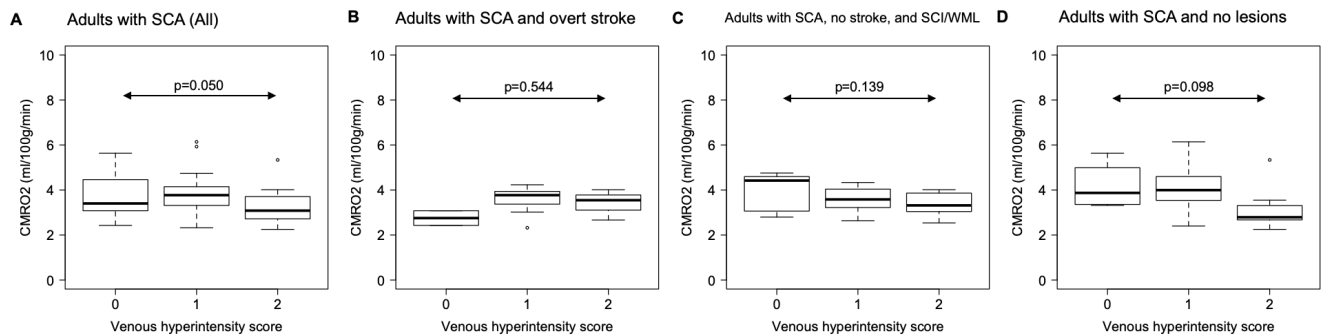

**Figure 2: CMRO<sub>2</sub> in adult controls.** In controls, no association was found between VHS and CMRO<sub>2</sub> (Wilcoxon rank sum p=0.991).

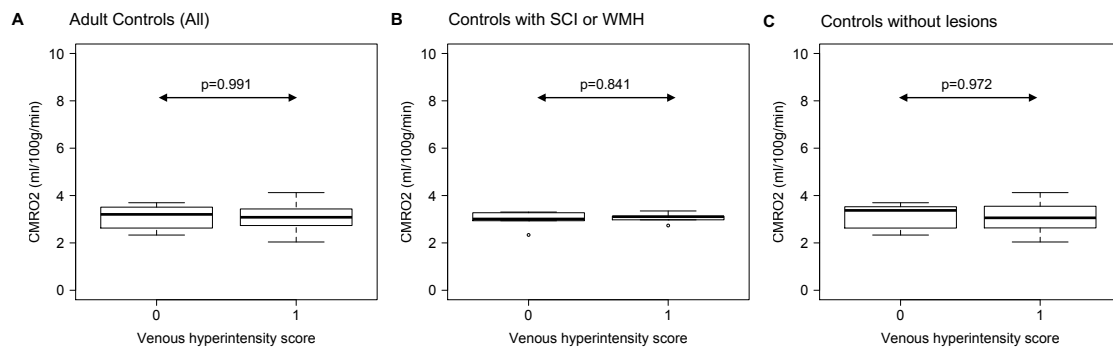

Supplement: JCB913123_Supplementary_Material.pdf [file JCB913123_Supplementary_Material.pdf]
